# Supplementary material for: X‐linked myotubular myopathy associated with an MTM1 variant in a Maine coon cat
Source: PubMed Central journal article supplement — J Vet Intern Med. 2022 Aug 13;36(5):1800–5. doi: 10.1111/jvim.16509 (PMC9511081; doi:10.1111/jvim.16509), 2022-08-13
Supplement: JVIM-36-1800-s003.pdf [file JVIM-36-1800-s003.pdf]

**Supplementary Figure 2.** Protein alignment of *MTM1* for diverse species.

Domestic cat (FCAT, ENSFCAT00000024072.4, Refseq XM\_023249466.1), human (HSA, ENST00000370396.7, Refseq NM\_000252.3), mouse (MMU, ENMUST00000051970.12, Refseq NM\_001164191.1), and zebrafish (DR, ENSDART00000149835.3, Refseq NM\_001037684.2). Protein alignment produced using PRALINE<sup>14</sup>. The highlighted alanine at position 152 is conserved across diverse species indicating function importance and a high conservation score. The c.455C>T alteration causes a p.ala152val amino acid change.
