# Supplementary material for: X‐linked myotubular myopathy associated with an MTM1 variant in a Maine coon cat
Source: PubMed Central journal article supplement — J Vet Intern Med. 2022 Aug 13;36(5):1800–5. doi: 10.1111/jvim.16509 (PMC9511081; doi:10.1111/jvim.16509), 2022-08-13
Supplement: JVIM-36-1800-s004.pdf [file JVIM-36-1800-s004.pdf]

|       |     |                                                              |     |
|-------|-----|--------------------------------------------------------------|-----|
| F_CAT | 1   | GGGGCGGGCCCTGGAGGGGGCGGAGCGGGGCCCGGGAGCGAAGCAGCCTGGCAACGGCGG | 60  |
|       |     |                                                              |     |
| H_SAP | 1   | AGC-----CGA-GCAGCCTGGCAACGGCGG                               | 24  |
| F_CAT | 61  | TGGCGCCCGGAGCCCGAGAGTTTCCAGAATGGCTTCTGCACCAACTTCTAAATATAATTC | 120 |
|       |     |                                                              |     |
| H_SAP | 25  | TGGCGCCCGGAGCCCGAGAGTTTCCAGGATGGCTTCTGCATCAACTTCTAAATATAATTC | 84  |
| F_CAT | 121 | ACACTCCTTGAGAAATGAATCTGTTAAGAGGACTTCTAGGGATGGAGTTAATCGAGACCT | 180 |
|       |     |                                                              |     |
| H_SAP | 85  | ACACTCCTTGAGAAATGAGTCTATTAAGAGGACGTCTCGAGATGGAGTCAATCGAGATCT | 144 |
| F_CAT | 181 | CAGTGAGACTGTTTCTCGACTTCCAGGAGAACTCGCATCACTGACAAAGAAGTTATTTA  | 240 |
|       |     |                                                              |     |
| H_SAP | 145 | CACTGAGGCTGTTTCTCGACTTCCAGGAGAACTAATCACTGACAAAGAAGTTATTTA    | 204 |
| F_CAT | 241 | CATATGTCCTTTCAATGGCCCATTAAGGGAAGAGTTTACATCACAAATTATCGTCTTTA  | 300 |
|       |     |                                                              |     |
| H_SAP | 205 | CATATGTCCTTTCAATGGCCCATTAAGGGAAGAGTTTACATCACAAATTATCGTCTTTA  | 264 |
| F_CAT | 301 | TTTAAGAAGTTTGAAACGGATTCTGCTCTAATACTTGATGTTTCTCTGGGTGTGATCTC  | 360 |
|       |     |                                                              |     |
| H_SAP | 265 | TTTAAGAAGTTTGAAACGGATTCTTCTCTAATACTTGATGTTTCTCTGGGTGTGATCTC  | 324 |
| F_CAT | 361 | CAGAATTGAAAAAATGGGAGGCGCGACAAGTAGAGGAGAAAATTCCTATGGTCTAGATAT | 420 |
|       |     |                                                              |     |
| H_SAP | 325 | GAGAATTGAAAAAATGGGAGGCGCGACAAGTAGAGGAGAAAATTCCTATGGTCTAGATAT | 384 |
| F_CAT | 421 | TACTTGTAAGACATGAGGAACCTGAGGTTTTCGCTGAAACAGGAAGGCCACAGCAGAAG  | 480 |
|       |     |                                                              |     |
| H_SAP | 385 | TACTTGTAAGACATGAGGAACCTGAGGTTTCGCTTGTAAACAGGAAGGCCACAGCAGAAG | 444 |

|       |     |                                                               |     |
|-------|-----|---------------------------------------------------------------|-----|
| F_CAT | 481 | GGATATGTTTGACATTCTCACGAGATACGCCTTTCCCCTGGCACACAGTCTGCCAATATT  | 540 |
|       |     |                                                               |     |
| H_SAP | 445 | AGATATGTTTGAGATCCTCACGAGATACGCGTTTCCCCTGGCTCACAGTCTGCCATTATT  | 504 |
| F_CAT | 541 | TGCATTTCTAAATGAAGAAAAGTTTAACTGGATGGATGGACAGTTTATAACCCAGTAGA   | 600 |
|       |     |                                                               |     |
| H_SAP | 505 | TGCATTTCTAAATGAAGAAAAGTTTAACTGGATGGATGGACAGTTTACAATCCAGTGGA   | 564 |
| F_CAT | 601 | AGAATACAGAAGGCAGGGCTTGCCTAACCACCACTGGAGAATCACTTTTATCAATAAGTG  | 660 |
|       |     |                                                               |     |
| H_SAP | 565 | AGAATACAGGAGGCAGGGCTTGCCTAACCACCACTGGAGAATAACTTTTATTAATAAGTG  | 624 |
| F_CAT | 661 | CTATGAACGTGTGACACCTACCCTGCTCTCTTGGTGGTTCATATCGTGCCTCAGATGA    | 720 |
|       |     |                                                               |     |
| H_SAP | 625 | CTATGAGCTCTGTGACACTTACCCTGCTCTTTTGGTGGTTCCTATCGTGCCTCAGATGA   | 684 |
| F_CAT | 721 | TGATCTCAGGAGAGTCGCAACTTTTAGATCCAGAAACCGAATTCCAGTGCTGTCATGGAT  | 780 |
|       |     |                                                               |     |
| H_SAP | 685 | TGACCTCCGGAGAGTTGCAACTTTTAGGTCCCGAAATCGAATTCCAGTGCTGTCATGGAT  | 744 |
| F_CAT | 781 | TCATCCAGAAAACAAGACCGTCATCGTGCCTTGCAGTCAGCCTCTTGTCGGTATGAGTGG  | 840 |
|       |     |                                                               |     |
| H_SAP | 745 | TCATCCAGAAAATAAGACGGTCATTGTGCGTTGCAGTCAGCCTCTTGTCGGTATGAGTGG  | 804 |
| F_CAT | 841 | TAAACGGAATAAGGATGATGAGAAGTATCTCGATGTTATCAGGGAGACTAATAGACAAAT  | 900 |
|       |     |                                                               |     |
| H_SAP | 805 | GAAACGAAATAAAGATGATGAGAAATATCTCGATGTTATCAGGGAGACTAATAAACAAAT  | 864 |
| F_CAT | 901 | TTCTAAACTCACAATCTATGATGCAAGACCCAATGTAAATGCAGTGGCGAACCAAGGCAAC | 960 |
|       |     |                                                               |     |
| H_SAP | 865 | TTCTAAACTCACCATTTATGATGCAAGACCCAGCGTAAATGCAGTGGCCAACCAAGGCAAC | 924 |

|       |      |                                                                |      |
|-------|------|----------------------------------------------------------------|------|
| F_CAT | 961  | AGGAGGAGGATATGAAAGTGATGATGCATATCACAAACGCCGAACCTTTTCTTCTTAGACAT | 1020 |
|       |      |                                                                |      |
| H_SAP | 925  | AGGAGGAGGATATGAAAGTGATGATGCATATCATAACGCCGAACCTTTTCTTCTTAGACAT  | 984  |
| F_CAT | 1021 | TCATAACATTCATGTTATGAGGGAATCTTTAAAAAAGTCAAAGACATTGTTTATCCTAA    | 1080 |
|       |      |                                                                |      |
| H_SAP | 985  | TCATAATATTCATGTTATGCGGGAATCTTTAAAAAAGTGAAGGACATTGTTTATCCTAA    | 1044 |
| F_CAT | 1081 | TGTGGAAGAATCTCACTGGTTGTCCAGTTTGGAGTCTACTCACTGGTTAGAACACATCAA   | 1140 |
|       |      |                                                                |      |
| H_SAP | 1045 | TGTAGAAGAATCTCATTGGTTGTCCAGTTTGGAGTCTACTCATTGGTTAGAACATATCAA   | 1104 |
| F_CAT | 1141 | GCTTGTGTTTGACGGGAGCCATTCAGTAGCAGACAAAGTTTCTTCAGGGAAGAGCTCAGT   | 1200 |
|       |      |                                                                |      |
| H_SAP | 1105 | GCTCGTTTTGACAGGAGCCATTCAGTAGCAGACAAAGTTTCTTCAGGGAAGAGTTCAGT    | 1164 |
| F_CAT | 1201 | GCTTGTGCACTGCAGTGATGGATGGGACAGAAGTCCCGCTGACGTCCCTGGCCATGCT     | 1260 |
|       |      |                                                                |      |
| H_SAP | 1165 | GCTTGTGCATTGCAGTGACGGATGGGACAGGACTGCTCAGCTGACATCCTTGCCATGCT    | 1224 |
| F_CAT | 1261 | GATGTTGGACAGCTTCTACCGGAGCATCGAAGGGTTTGAAATACTGGTACAGAAAGAATG   | 1320 |
|       |      |                                                                |      |
| H_SAP | 1225 | GATGTTGGATAGCTTCTATAGGAGCATTGAAGGGTTCGAAATACTGGTACAAAAAGAATG   | 1284 |
| F_CAT | 1321 | GATAAGTTTTGGACATAAATTTGCATCTAGAATAGGTCATGGTGACAAAAACCATGCCGA   | 1380 |
|       |      |                                                                |      |
| H_SAP | 1285 | GATAAGTTTTGGACATAAATTTGCATCTCGAATAGGTCATGGTGATAAAAACCACACCGA   | 1344 |
| F_CAT | 1381 | TGCTGACCGATCTCCTATTTTCTCCAGTTTATTGATTGTGTATGGCAAATGTCAAACA     | 1440 |
|       |      |                                                                |      |
| H_SAP | 1345 | TGCTGACCGTTCTCCTATTTTCTCCAGTTTATTGATTGTGTGTGGCAAATGTCAAACA     | 1404 |

|       |      |                                                               |      |
|-------|------|---------------------------------------------------------------|------|
| F_CAT | 1441 | GTTCCCTACAGCTTTTGAATTCAATGAACGGTTTTTTGATTACAATTTTGGATCATCTGTA | 1500 |
|       |      |                                                               |      |
| H_SAP | 1405 | GTTCCCTACAGCTTTTGAATTCAATGAACAATTTTTGATTATAATTTTGGATCATCTGTA  | 1464 |
| F_CAT | 1501 | TAGTTGCCGGTTTGGTACTTTCTTATACAACGTGAATCTGCTCGAGAAAGACAGAAAGT   | 1560 |
|       |      |                                                               |      |
| H_SAP | 1465 | TAGTTGCCGATTTGGTACTTTCTTATTCAACTGTGAATCTGCTCGAGAAAGACAGAAGGT  | 1524 |
| F_CAT | 1561 | TACAGAAAGAACAGTATCTTTGTGGTCACTGATAAACAGTAATAAAGACAAATTCAAAAA  | 1620 |
|       |      |                                                               |      |
| H_SAP | 1525 | TACAGAAAGGACTGTTTCTTTATGGTCACTGATAAACAGTAATAAAGAAAAATTCAAAAA  | 1584 |
| F_CAT | 1621 | CCCCTTCTATACTAAAGAAATCAATCGAGTTTATATCCAGTTGCCAGTATGCGTCACTT   | 1680 |
|       |      |                                                               |      |
| H_SAP | 1585 | CCCCTTCTATACTAAAGAAATCAATCGAGTTTATATCCAGTTGCCAGTATGCGTCACTT   | 1644 |
| F_CAT | 1681 | GGAACCTTTGGGTGAATTACTACATTAGATGGAACCCAGATCAAGCAACAACAGCCCAA   | 1740 |
|       |      |                                                               |      |
| H_SAP | 1645 | GGAACCTCTGGGTGAATTACTACATTAGATGGAACCCAGGATCAAGCAACAACAGCCGAA  | 1704 |
| F_CAT | 1741 | CCCGGTGGAACAGCGCTACGTGGAGCTCCTGGCCTTGCGTGACGAGTACATCCAGCGGCT  | 1800 |
|       |      |                                                               |      |
| H_SAP | 1705 | TCCAGTGGAGCAGCGTTACATGGAGCTCTTAGCCTTACGCGACGAATACATAAAGCGGCT  | 1764 |
| F_CAT | 1801 | CGAGGAGTTGCAGCTCGCCGGCTCCGCCAAGCTCGCCGAGCCCTCCACCTCGCCGGCCGG  | 1860 |
|       |      |                                                               |      |
| H_SAP | 1765 | TGAGGAAGTGCAGCTCGCCAACTCTGCCAAGCTTTCTGATCCCCCAACTTCACCTTCCAG  | 1824 |
| F_CAT | 1861 | CCCTTCGCCGATGATGCCCCATGTGCACACCCACTTCTGAGACGGGACCTGGGCGCCGCG  | 1920 |
|       |      |                                                               |      |
| H_SAP | 1825 | TCCTTCGCAAATGATGCCCCATGTGCAAACCTCACTTCTGAGGGGGACCTGGCACC GCA  | 1884 |

|       |      |                                                               |      |
|-------|------|---------------------------------------------------------------|------|
| F_CAT | 1921 | GCGCAGCTCTGGGCAGAGGACGTCGTGGCCTTTCATCAGGGGCCTCTGTACAAAAGTAGAT | 1980 |
|       |      |                                                               |      |
| H_SAP | 1885 | TTAGAGCTCGAAATAAAGGCGATAGCTGACTTTCATTTGGGGCATTGTAAAAAGTAGAT   | 1944 |
| F_CAT | 1981 | TGAAATACTTGCCTCCATGTAGAACTGGAACCTAACACGATCTTAAACTCTTAAATATGTG | 2040 |
|       |      |                                                               |      |
| H_SAP | 1945 | TAAAATATTTGCCTCCATGTAGAACTTGAACCTAACATAATCTTAAACTCTTGAATATGTG | 2004 |
| F_CAT | 2041 | CCTTCTAGAATACATATTACAAGAAAACCTAGCATCTACACGGCAATCAGAAGAAAGGA   | 2100 |
|       |      |                                                               |      |
| H_SAP | 2005 | CCTTCTAGAATACATATTACAAGAAAACCTACAGGGTCCACACGGCAATCAGAAGAAAGGA | 2064 |
| F_CAT | 2101 | GCCAAGATGAGGTTTTGGAAAATGCTAACACCTTTCAGAGCAGGTTTTGAGAGA-----   | 2155 |
|       |      |                                                               |      |
| H_SAP | 2065 | GCTGAGATGAGGTTTTGGAAAACCTGACACCTTAAAAAGCAGTTTTTGAAGACAAAA     | 2124 |
| F_CAT | 2156 | -TTAAATTTAATTTACCTCTTTTGAATACTATGTATACAATATCTATTTGTGGGCTTA    | 2214 |
|       |      |                                                               |      |
| H_SAP | 2125 | TTTAGATTTAATTTACGTCTTGAGAAATACTATATATACAATATATATTTGTGGGCTTA   | 2184 |
| F_CAT | 2215 | ATTGGAACGACGTGATTTTAAACT-AAAGTGAAAACCTGTGTTTGTGAAACGAATTTGCC  | 2273 |
|       |      |                                                               |      |
| H_SAP | 2185 | ATTGAAACAACATTATTTTAAAATCAAAGGGGATA--TATGTTTGTGGAATGGATTTTCC  | 2242 |
| F_CAT | 2274 | TTAGGTTGCTCACGACAGTTGCTTTGGATTACCTAAAATGAATCCAAATGTGAAAGATG-  | 2332 |
|       |      |                                                               |      |
| H_SAP | 2243 | TGAAGCTGCTTA--ACAGTTGCTTTGGATTCTCTAAGATGAATCCAAATGTGAAAGATGC  | 2300 |
| F_CAT | 2333 | ---TTATTGCCAAAACCAAATGAGCTGTTCTTCTGAGGCATCATCCAAAAGCAAGGTGT   | 2389 |
|       |      |                                                               |      |
| H_SAP | 2301 | ATGTTACTGCCAAAACCAAATGAGCTCAGCTTCTTAGGCATTACCCAAAAGCAAGGTGT   | 2360 |

|       |      |                                                               |      |
|-------|------|---------------------------------------------------------------|------|
| F_CAT | 2390 | TTAAATAATTGCCAAATTTTATACCATCGTCAAGTGGTACTTAAAGAGAAATAGCTGTG   | 2449 |
|       |      |                                                               |      |
| H_SAP | 2361 | TTAAGTAATTGCCAGCTTTTATACCATCATGA-GTGGTACTTAAGGAGAAATAGCTGTA   | 2419 |
| F_CAT | 2450 | TAGATGAGTTTTTCATTAGTTTGAATTTTAGAATATGAAGTGTTCCTAATTTTCA       | 2509 |
|       |      |                                                               |      |
| H_SAP | 2420 | TAGATGAGTTTTTCATTATTTGAAATTTAGGGGTAGAAAATGTTTTCCCTAATTTTCC    | 2479 |
| F_CAT | 2510 | AGAGGAGCGTATTTTTATATT-----ACACAGATGGGGCCAGTCAAATAGGATTTGAT    | 2563 |
|       |      |                                                               |      |
| H_SAP | 2480 | AGAGAAGCCTATTTTTATATTTTTAAAAAACTGACAGGGCCAGTTAAATATGATTTGCA   | 2539 |
| F_CAT | 2564 | TTTTTTTTTAACGTTTTTGCCGTTCTATTTCTGAGTCTTCTATGAGCTTGCCATAAAT    | 2623 |
|       |      |                                                               |      |
| H_SAP | 2540 | TTTTTTA--AA---TTTGCCAGTTTTATTTCTAAATTCCTTCATGAGCTTGCCATAAAT   | 2594 |
| F_CAT | 2624 | TCTGACCCACTTTCAGTTATGGAAAACCCCTCATATAGCACTGTTTGAGGATGGTGGG    | 2683 |
|       |      |                                                               |      |
| H_SAP | 2595 | TCGGAATGGTTTTTCGGGTTGTGGCAAACCCCAAAGAGAGCACTGTCCAAGGATGTCGGGA | 2654 |
| F_CAT | 2684 | GCGTTATGCTGCTGAGGTGACTGTTTTCGCAAACATCGCTCTAGTCAGACCAGCTTATCT  | 2743 |
|       |      |                                                               |      |
| H_SAP | 2655 | GCATCCTGCTGCTTAGGGGAATGTTTTCGCAAATGTTGCTCTAGTCAGTCCAGCTCATCT  | 2714 |
| F_CAT | 2744 | GCCAAAGTGTAGGGTCGACCATCTCGGACGTATGAGCTGTTGCTAGAGCATCATTCTTTG  | 2803 |
|       |      |                                                               |      |
| H_SAP | 2715 | GCCAAAATGTAGGG-CTACCGTCTTGGATGCATGAGCTATTGCTAGAGCATCATCCTTAG  | 2773 |
| F_CAT | 2804 | AAATAAAAGCTGCAGATGTACATTTGTTGAGCGTATT                         | 2840 |
|       |      |                                                               |      |
| H_SAP | 2774 | AAATCAGTGCCCCAGATGTACATGTGTTGAGCGTATTCTTGAAAGTATTGTGTTTATGCA  | 2833 |

H\_SAP 2834 TTTCAATTTCAATGGTGTGGCTTCCCCTCCCCACCCACGCGTGCATAAAAACTGGTTC 2893  
H\_SAP 2894 TACAAATTTTACTTGAAGTACCAGGCCGTTTGCTTTTTTCAGGTTGTTTTGTTTTATAGT 2953  
H\_SAP 2954 ATTAAGTGAAATTTTAAATGCACAGTTCATTTGCTATCTGAACTAATTCATTTATTAAG 3013  
H\_SAP 3014 TATATTTGTAAAAGCTAAGGCTCGAGTTAAAACAATGAAGTGTTCACATGATTTGTAA 3073  
H\_SAP 3074 AGGACTATTTATAACTAATATGGTTTTGTTTTCAATGAATTAAGAAAGATTAAATATATC 3133  
H\_SAP 3134 TTTGTAAATTATTTTATGTCATAGTTTAAATTGGTCTACCAAGTAAGACATCTCAAATACA 3193  
H\_SAP 3194 GTAGTATAATGTATGAATTTTGTAAAGTATAAGAAATTTTATTAGACATTCTCTTACTTTT 3253  
H\_SAP 3254 TGTAATGCTGTAAATATTTTCATAAATTAACAAAGTGTCACTCCATAAAAAAGAAAGCTAA 3313  
H\_SAP 3314 TACTAATAGCCTAAAAGATTTTGTGAAATTCATGAAAACTTTTTAATGGCAATAATGAC 3373  
H\_SAP 3374 TAAAGACCTGCTGTAATAAATGTATTAACCTGAAACCTAA 3412

**Supplementary Figure 1.** Coding sequencing alignment of *MTM1*. Alignment of domestic cat cDNA (Query: ENSFCAT00000024072.4, Refseq XM\_023249466.1) and Homo sapiens cDNA (Subject: ENST00000370396.7, Refseq NM\_000252.3) using the Needleman-Wunsch tool. Position of the cat *MTM1* cytosine to thymidine change highlighted.
